# Supplementary material for: Computational Analysis Reveals Monomethylated Triazolopyrimidine as a Novel Inhibitor of SARS-CoV-2 RNA-Dependent RNA Polymerase (RdRp)
Source: MDPI journal article supplement (doi:10.3390/molecules27030801), 2022-01-26
Supplement: s1 [file s1]

## Supplementary Material

**Table S1.** Literature survey of transcriptomics studies focused on expression of SARS-CoV-2 RdRp in infected human cell line and patient samples.

| Cell Line/ Patient Sample                                                                                 | Method  | Reference |
|-----------------------------------------------------------------------------------------------------------|---------|-----------|
| Normal human bronchial epithelial (NHBE) and human adenocarcinomic alveolar basal epithelial cells (A549) | RNA-Seq | [29]      |
| Throat/nasal swab grown in <i>Cercopithecus aethiops</i> kidney epithelial cells (Vero CCI-81)            | RT-qPCR | [30]      |
| Throat swab samples                                                                                       | RT-qPCR | [31]      |
| Human lung and colon samples                                                                              | RT-qPCR | [32]      |
| RT-qPCR = reverse transcriptase quantitative PCR; RNA-Seq = ribonucleic acid sequencing                   |         |           |

**Table S2.** Identification of SARS-CoV-2 RdRp peptides found in infected human cell line and patient samples.

| Project ID | Cell Line/ Patient Sample | Peptide sequences                       | Positions | Accession ID |
|------------|---------------------------|-----------------------------------------|-----------|--------------|
| PXD017710  | Colan carcinoma cell line | HDFFKFRIDVDMVPHISR                      | 4491-4508 | QOE87934.1   |
|            |                           | NVTPTITQMNLKYAISAKNR                    | 4926-4945 | QOF20355.1   |
|            |                           | DEDDNLIDSYFVVKRPTFSNYQHEETIYNLLKDCPAVAK | 4452-4490 | QPM30612.1   |
|            |                           | GATVLIGTSKFYGGWHNMLK                    | 4976-4995 | QLC46995.1   |
|            |                           | QCDDYVYLPYPDPSRILGAGCFVDDIVK            | 5214-5241 | QNO75717.1   |
|            |                           | QALLKTVQFCDAIR                          | 4576-4589 | QMS52714.1   |
| PXD018581  | Lung carcinoma cell line  | FLPFQQFGRDIADTTDAVR                     | 4929-4947 | QOL77454.1   |
|            |                           | HFFFAQDGNAAISDYDYRYNLPTMCDIRQLLFVVEVADK | 4831-4870 | QNO32046.1   |
|            |                           | HFDEGNCGLKEILVTYNCCDDDYFNKK             | 4525-4552 | QKJ68603.1   |
| PXD019686  | Nasal swab simili         | AFDIYNDKVAGFAKFLK                       | 4426-4442 | QOQ08810.1   |
|            |                           | AFDIYNNKVAGFAKFLK                       | 4426-4442 | QKR84563.1   |

**Table S3.** Viral RdRp amino acid sequences used for phylogenetic analysis

|                                                                                                                                                                                                                                                                                                                                                                                                                                                                                                                                                                                                                                                                                                                                                                                                                                                                                                                                                                                                                                                                                                                                                            |
|------------------------------------------------------------------------------------------------------------------------------------------------------------------------------------------------------------------------------------------------------------------------------------------------------------------------------------------------------------------------------------------------------------------------------------------------------------------------------------------------------------------------------------------------------------------------------------------------------------------------------------------------------------------------------------------------------------------------------------------------------------------------------------------------------------------------------------------------------------------------------------------------------------------------------------------------------------------------------------------------------------------------------------------------------------------------------------------------------------------------------------------------------------|
| <p>&gt;SARS-CoV  UniProt ID: P0C6X7 (Severe acute respiratory syndrome coronavirus)</p> <p>SADASTFLNRVCGVSAARLTPCGTGTSTDVVYRAFDIYNEKVAGFAKFLKTNCCRFQEKD<br/> EEGNLLDSYFVVKRHTMSNYQHEETIYNLVKDCPAVAVHDDFFKFRVDGDMVPHISRQRLT<br/> KYTMADLVYALRHFDEGNCDTLKEILVTYNCCDDDYFNKKDWYDFVENPDILRVYANLGE<br/> RVRQSLLKTVQFCDAMRDAGIVGVLTLDNQDLNGNWYDFGDFVQVAPGCGVPIVDSYYSL<br/> LMPILTLTRALAAESHMDADLAKPLIKWDLKDYDFTEERLCLFDRYFKYWDQTYHPNCIN<br/> CLDDRCILHCANFNVLSTVFPPTSFGPLVRKIFVDGVPFVVSTGYHFRELGVVHNQDVN<br/> LHSSRSLFKELLVYAADPAMHAASGNLLLDKRTTCFSVAALTNNVAFQTVKPGNFNKDFY<br/> DFAVSKGFFKEGSSVELKHFFFAQDGNAAISDYDYRYNLPMTCDIRQLLFVVEVVVKYF<br/> DCYDGGCINANQVIVNNLDKSAGFPFNKWGKARLYYDSMSYEDQDALFAYTKRNVIPITIT<br/> QMNLKYAISAKNRARTVAGVSICSTMTNRQFHQKLLKSIAATRGATVVIGTSKFYGGWHN<br/> MLKTVYSDVETPHLMGWDYPKCDRAMPNMLRIMASLVLARKHNTCCNLSHRFYRLANCA<br/> QVLSEMVMCGGSLYVKPGGTSSGDATTAYANSVFNICQAVTANVNALLSTDGNKIADKYV<br/> RNLQHRLYECLYRNRDVEHFVDEFYAYLRKHFSMMILSDDAVVCYNSNYAAQGLVASIK<br/> NFKAVLYYQNNVFMSEAKCWTETDLTKGPHEFCSQHTMLVKQGDDYVYLPYPDPSRILGA<br/> GCFVDDIVKTDGTLMIERFVSLAIDAYPLTKHPNQEYADVHFLYLQYIRKLHDELTHGML<br/> DMYSVMLTNDNTSRYWEPEFYEAMYPHTVLQ</p> |
| <p>&gt;SARS-CoV-2  UniProt ID: P0DTD1 (Severe acute respiratory syndrome coronavirus 2)</p> <p>SADAQSFLNRVCGVSAARLTPCGTGTSTDVVYRAFDIYNDKVAGFAKFLKTNCCRFQEKD<br/> EDDNLIDSYFVVKRHTFSNYQHEETIYNLLKDCPAVAKHDDFFKFRIDGDMVPHISRQRLT<br/> KYTMADLVYALRHFDEGNCDTLKEILVTYNCCDDDYFNKKDWYDFVENPDILRVYANLGE<br/> RVRQALLKTVQFCDAMRNAGIVGVLTLDNQDLNGNWYDFGDFIQTTPGSGVPVVDSDYYSL<br/> LMPILTLTRALTAESHVDTDLTKPYIKWDLKDYDFTEERLKLFDRIYFKYWDQTYHPNCVN<br/> CLDDRCILHCANFNVLSTVFPPTSFGPLVRKIFVDGVPFVVSTGYHFRELGVVHNQDVN<br/> LHSSRSLFKELLVYAADPAMHAASGNLLLDKRTTCFSVAALTNNVAFQTVKPGNFNKDFY<br/> DFAVSKGFFKEGSSVELKHFFFAQDGNAAISDYDYRYNLPMTCDIRQLLFVVEVVVKYF<br/> DCYDGGCINANQVIVNNLDKSAGFPFNKWGKARLYYDSMSYEDQDALFAYTKRNVIPITIT<br/> QMNLKYAISAKNRARTVAGVSICSTMTNRQFHQKLLKSIAATRGATVVIGTSKFYGGWHN<br/> MLKTVYSDVENPHLMGWDYPKCDRAMPNMLRIMASLVLARKHTTCCSLSHRFYRLANCA</p>                                                                                                                                                                                                                                                                                                       |

QVLSEVMVMCGGSLYVKPGGTSSGDATTAYANSVFNICQAVTANVNALLSTDGNKIADKYV  
RNLQHRLYECLYRNRDVDTDVNEFYAYLRKHFSMMILSDDAVVCFNSTYASQGLVASIK  
NFKSVLYYQNNVFMSEAKCWTETDLTKGPHEFCSQHTMLVKQGDDYVYLPYDPDSRILGA  
GCFVDDIVKTDGTLMIERFVSLAIDAYPLTKHPNQEYADVFLYLQYIRKLHDELTGHML  
DMYSVMLTNDNTSRYWEPEFYEAMYPHTVLQ

>MERS| UniProt ID: K9N7C7 (Middle East respiratory syndrome-related coronavirus)  
SKDSNFLKRVRGSIVNARIEPCSSGLSTDVVFRAFDICNYKAKVAGIGKYYKTNTCRFVE  
LDDQGHHLDSYFVVKRHTMENYELEKHCYDLLRDCDAVAPHDFFIFDVDKVKTPHIVRQR  
LTEYTMMDLVYALRHFQDNSEVLKAILVKYGCCDVTYFENKLWFDVFNPSVIGVYHKL  
ERVRQAILNTVKFCDHMKAGLVGVLTLDNQDLNGKWYDFGDFVITQPGSGVAIVDSYYS  
YLMPVLSMTDCLAAETHRDCDFNKPLIEWPLTEYDFTDYKVQLFEKYFKYWDQTYHANCV  
NCTDDRCVLHCANFNVLFAMTMPKTCFGPIVRKIFVDGVPFVVSCGYHYKELGLVMNMDV  
SLHRHRLSLKELMMYAADPAMHIASSNAFLDLRTSCFSVAALTTGLTFQTVRPGNFNQDF  
YDFVVSXGFFKEGSSVTLKHFFFAQDGNAAITDYNYYSYNLPTMCDIKQMLFCMEVVNKY  
FEIYDGGCLNASEVVNNLDKSAGHPFNKFGKARVYYESMSYQEDEL FAMTKRNVIP TM  
TQMNLYAISAKNRARTVAGVSILSTMTNRQYHQKMLKSMAATRGCATCIGTTKFGYGGWD  
FMLKTLKYKDVDNPHLMGWDYPKCDRAMPNMCRIASLILARKHGTCCTTRDRFYRLANEC  
AQVLSEYVLCGGGYVVKPGGTSSGDATTAYANSVFNILQATTANVSALMGANGNKIVDKE  
VKDMQFDLYNVYRSTSPDPKFVDKYYAFLNKHFSMMILSDDGVVCYNSDYAAKGYIAGI  
QNFKETLYYQNNVFMSEAKCWVETDLKKGPHEFCSQHTLYIKDGDDGYFLPYDPDSRILS  
AGCFVDDIVKTDGTLMVERFVSLAIDAYPLTKHEDIEYQNVFWVYLQYIEKLYKDLTGHM  
LDSYSVMLCGDNSAKFWEEAFYRDLYSSPTTLQ

>Rhinovirus| UniProt ID: P23008 (Human rhinovirus 1A (HRV-1A))  
GQIKVNXHATECGLPTIHTPSKTKLQPSVFYDVFPGSKEPAVLTDNDPRLEVNFKEALFS  
KYKGNVECNLNEHMEIAIAHYSACLMTLDIDSRPIALESVFGIEGLEALDLNTSAGFPY  
VTMGIKKRDLINNKTKDISRLKEALDKYGVDLPMITFLKDELRRKKEISTGKTRVIEASS  
INDTILFRITTFGNLFSKFHLNPGVVTGSAVGCDPETFWSKIPVMDGDCIMAFDYTNYDG  
SIHPVWFQALKKVLENLSFQSNLIDRLCYSKHLFKSTYYEVAGGVPSGCSGTSIFNTMIN  
NIIRTLVLDAYKNIDLDKLKIIAYGDDVIFS YKYTLDM EAIANEGKKYGLTITPADKSN  
EFKKLDYSNVTF LKRGFKQDERHTFLIHPTFPVEEIHESIRWTKKPSQM QEHVLSLCHLM  
WHNGRKVYEDFSSKIRSVSAGRALYIPPYDLLKHEWYEKF

>RSV\_Strain\_B| UniProt ID: O36635 (Human respiratory syncytial virus B (strain B1))

MDPIINGNSANVYLTD SYLKGVISFSECNALG SYLFNGPYLKNDYTNLISRQSP LLEHMN  
LKKLTITQSLISRYHKGELKLEPTYFQSLLMTYKSMSSSEQIATTNLLKKIIRRAIEIS  
DVKVYAILNKLGLKEKDRVKPNNSGDENSVLTTHKDDILSAVESNQSYTNSDKNHSVN  
QNITIKTTLLKKLMCSMQHPPSWLIHWFNLYTKLNNILTQYRSNEVKSHGFILIDNQTLS  
GFQFILNQYGCIVYHKGGLKITT TTYNQFLTWKDISLSRLNVCLITWISNCLNTLNKSLG  
LRCGFNNVLSQLFLYGDCILKLFHNEGFIIEKEVEGFIMSLILNITEEDQFRKRFYNM  
LNNITDAAIKAQKNLLSRVCHTLLDKTVSDNIINGKWIILLSKFLKLIKLAGDNNLNNLS  
ELYFLFRIFGHPMVDERQAMDAVRINCNETKFYLLSSLSTLRGAFIYRIIKGFVNTYNRW  
PTLRNAIVLPLRWLNYYKLNTPSLEITENDLIILSGLRFYREFHLPKKVDLEMIINDK  
AISPPKDLIWTSPRNYMPSHIQNYIEHEKLFSESDRSRRVLEY YLRDNKFNECDLYNC  
VVNQSYLNNNSNHVVSLTGKERELSVGRMFAMQPGMFRQIQILAEKMAENILQFFPESLT  
RYGDLELQKILELKAGISNKS NRYNNDYNNYISKCSIITDLSKFNQAFRYETSCICSDVL  
DELHGVQSLFSWLHLTIPLVTIICTYRHAPPFIKDHVVNLNEVDEQSGLYRYHMGGIEGW  
CQKLWTIEAISLLDLISLKGKFSITALINGDNQSIDISKPVRLIEGQTHAQADYLLALNS  
LKLLYKEYAGIGHKLKGTETYISRDMQFMSKTIQHNGVYYPASIKKVL RVGPWINTILDD  
FKVSLESIGSLTQELEYRGESLLCSLIFRNWLYNQIALQLRNHALC NNKLYLDILKVLK  
HLKTFFNLDSIDMALSLYMNLPMLFGGGDPNLLYRSFYRRTPDFLTEAIVHSVFVLSYYT  
GHDLDQDKLQDLPDDRNLNKFLT CVITFDKNPNAEFVTLMRDPQALGSERQAKITSEINRLA  
VTEVLSIAPNKIFS KSAQHYYTTTEIDLNDIMQNIPTYPHGLRVVYESLPFYKAEKIVNL  
ISGTSITNILEKTS AIDTTDINRATDMMRKNITLLIRILPLDCNKDKRELLSLENLSIT  
ELSKYVRERSWSLSNIVGVTSPSIMFTMDIKYTTSTIASGIIIEKYNVNSLTRGERGPTK  
PWVGSSTQEKKTMPVYNRQVLT KKKQRDQIDLLAKLDWVYASIDNKDEFMEELSTGTLGLS  
YEKAKKLFPQYLSVNYLHRLTVSSRPCEFPASIPAYRTTNYHFDTSPINHVLTEKYGDED  
IDIVFQNCISFGLSLMSVVEQFTNICPNRIILIPKLNEIHLMKPPIFTGDVDIILKQVI  
QKQHMFLPDKISLTQYVELFLSNKALKSGSNINSNLILVHKMSDYFHNAYILSTNLAGHW  
ILIIQLMKDSKGIFEKDWGEGYITDHMFINLVFFNAYKTYLLCFHKGYGKAKLECDMNT  
SDLLCVLELIDSSYWKSM SKVFLEQKVIKYIVNQDTS LHRIKGCHSFKLWFLKRLNNAKF  
TVCPWVVNIDYHPT HMKAILS YIDLVRMGLINVDKLTIKNKNKFNDEFYTSNLFYISYNF  
SDNTHLLTKQIRIANSELEDNYNKL YHPTPETLENISLIPVKSNN SNKPKFCISGNTESI  
MMSTFSNKMHIKSSTVTTRFNYSKQDLYNLFPNVVIDRIIDHSGNTAKSNQLYITTSHQT  
SLVRNSASLYCMLPW HHHVNRFN VFSSTGCKISIEYILKDLKIKDPSCIAFIGEGAGNLL  
LRTVVELHPDIRYIYRSLKDCNDHSLPIEFLRLYNGHINIDYGENLTIPATDATNNIHWS

YLHIKFAEPISIFVCDAELPVTANWSKIIIEWSKHVRKCKYCSSVNRCLIAKYHAQDDI  
DFKLDNITILKTYVCLGSKLKGSEVYLVLTIGPANILPVFDVVQNAKLIFSRTKNFIMPK  
KTDKESIDANIKSLIPFLCYPITKKGIKTSLSKLKSVVNGDILSYSIAGRNEVFSNKLIN  
HKHMNILKWLDHVLNFRSAELNYNHLYMIESTYPYLSELLNSLTTNELKKLIKITGSVLY  
NLPNEQ

>RSV\_Strain\_A| UniProt ID: Q9IWW8 (Human respiratory syncytial virus A (strain Long))  
MDPIINGNSANVYLTD SYLKGVISFSECNALGSYIFNGPYLKNDYTNLISRQNPLIEHMN  
LKKLNITQSLISKYHKGEIKLEEPTYFQSLLMTYKSMTSLEQIATTNLLKKIIRRAIEIS  
DVKVYAILNKLGLKEKDKIKSNNGQDEDNSVITTIKDDILSAVKDNQSHLKADKNHSTK  
QKDTIKTTLLKKLMCSMQHPPSWLIHWFNLYTKLNNILTQYRSNEVKNHGFILIDNQTLS  
GFQFILNQYGCIVYHKELKRITVTTYNQFLTWKDISLSRLNVCLITWISNCLNTLNKSLG  
LRCGFNNVILTQLFLYGDCILKLFHNEGFIKEVEGFIMSLILNITEEDQFRKRFYNM  
LNNITDAANKAQKNLLSRVCHTLDDKTVDNIINGRWIILLKFLKLIKLAGDNNLNNLS  
ELYFLFRIFGHPMVDERQAMDAVKVNCNETKFYLLSSLSMLRGAFIYRIIKGFVNNYNRW  
PTLRNAIVLPLRWLTYYKLNTYPSLLELTERDLIVLSGLRFYREFRLPKKVDLEMIINDK  
AISPPKNLIWTSFPRNYMPSHIQNYIEHEKLKFSESDKSRRVLEYLRLDNKFNECDLYNC  
VVNQSYLNNPNHVVS LTGKERELSVGRMFAMQPGMFRQVQILA EKMI AENILQFFPESLT  
RYGDLELQKILELKAGISNKS NRYNDNYNNYISKCSIITDLSKFNAFRYETSCICSDVL  
DELHGVQSLFSWLHLTIPHVTIICTYRHAPPYIRDHNVDLNNVDEQSGLYRYHMGGIEGW  
CQKLWTIEAISLLDLISLKGKFSITALINGDNQSIDISKPVRLMEGQTHAQADYLLALNS  
LKLLYKEYAGIGHKLKGTETYISRDMQFMSKTIQHNGVYYPASIKKVL RVGPWINTILDD  
FKVSLESIGSLTQELEYRGESLLCSLIFRNWLYNQIALQLKNHALC NKNLYLDILKVLK  
HLKTFFNLDNIDTALTLYMNL PMLFGGGDPNLLYRSFYR RTPDFLTEAIVHSVFILSYYT  
NHDLDKDLQDLSDDR LNKFLTCHITFDKNPNAEFVTLMRDPQALG SERQAKITSEINRLA  
VTEVLSTAPNKIFS KSAQH YTTTEIDLNDIMQNI EPTYPHGLRVVYESLPFYKA EKIVNL  
ISGTKSITNILEKTS AIDLTDIDRAT EMMRKNITLLIRILPLDCNRDKREILSMENLSIT  
ELSKYVRERSWSLSNIVGVTSPSIMYTMDIKYTTSTIASGIIIEKYNVNSLTRGERGPTK  
PWVGSSTQEKKTMPVYNRQVLTKKQRDQIDLLAKLDWVYASIDNKDEFMEELSIGTLGLT  
YEKAKKLFPQYLSVNYLHRLTVSSRPCEFPASIPAYRTTNYHFDTSPINRILTEKYGDED  
IDIVFQNCISFGLSLMSVVEQFTNVCPNRIILIPKLNEIHLMKPPIFTGDVDIHKLKQVI  
QKQHMFLPDKISLTQYVELFLSNKTLKSGSHVNSNLILAHKISDYFHNTYILSTNLAGHW  
ILIIQLMKDSKGIFEKDWGEGYITDHMFINKVFFNAYKTYLLCFHKGYGKAKLECDMNT

SDLLCVLELIDSSYWKSMSKVLFLEQKVIKYILSQDASLHRVKGCHSFKLWFLKRLNVAEF  
TVCPWVVNIDYHPHTMKAILTYIDLVRMLINIDRIHIKNKHKFNDEFYTSNLFYINYNF  
SDNTHLLTKHIRIANSELENNYNKLYHPTPETLENILANPIKSNDKKTLDYCYGKNVDS  
IMLPLLSNKKLVKSSAMIRTNYSKQDLYNLFPTVVIDRIIDHSGNTAKYNQLYTTTSHQI  
SLVHNSTSLYCMLPWHHINRFNFVFSSTGCKISIEYILKDLKIKDPNCIAFIGEGAGNLL  
LRTVVELHPDIRYIYRSLKDCNDHSLPIEFLRLYNGHINIDYGENLTIPATDATNNIHWS  
YLHIKFAEPISLFVCDAELPVTVNWSKIIIEWSKHVRKCKYCSSLVNKCTLIVKYHAQDDI  
DFKLDNITILKTYVCLGSKLKGSEVYLVLTIGPANIFPVFNVVQNAKLILSRKTNFIMPK  
KADKESIDANIKSLIPFLCYPITKKGINTALSKLKSVVSGDILSYSIAGRNEVFSNKLIN  
HKHMNILKWFNHLNFRSTELNYNHLVMVESTYPYLSELLNSLTTELKLIKITGSLLY  
NFHNE

**Table S4.** Molecular docking results of Comp-1 and EMC-1 with other available SARS-CoV-2 non-structural proteins.

| Protein/Ligand      | EMC-1    |              | Comp-1   |              | TBP-2    |              | TPP-1    |              |
|---------------------|----------|--------------|----------|--------------|----------|--------------|----------|--------------|
| PDB ID_Protein Name | Affinity | Total Energy |
| 5rhb_MPro           | -6.739   | -1.884       | -6.031   | -5.596       | -5.923   | -6.512       | -6.674   | -0.538       |
| 5rlj_Helicase       | -7.545   | -4.596       | -6.475   | -8.296       | -6.112   | -9.81        | -6.963   | -6.035       |
| 6wtc_NSP8           | -6.474   | 1.683        | -6.689   | -5.693       | -6.249   | -6.705       | -6.462   | 0.056        |
| 7cz4_NSP3           | -8.359   | -5.425       | -6.996   | -7.21        | -6.208   | -6.488       | -7.043   | -3.45        |
| 7k7p_NSP1           | -6.769   | -0.568       | -6.508   | -4.72        | -6.285   | -5.569       | -6.57    | -2.187       |
| 7keh_NSP15          | -7.332   | -2.183       | -6.887   | -13.277      | -6.444   | -9.075       | -6.667   | -3.873       |
| 7msx_NSP2           | -7.607   | -1.233       | -6.69    | -7.684       | -6.274   | -6.048       | -7.295   | -6.405       |

All energies are in kcal/mol. Colour fill indicates the best energies of docked complex.

**Table S5.** Molecular docking results of drugs studied against mutated SARS-CoV-2 RdRp (P323L).

| <b>Ligand</b> | <b>Affinity</b> | <b>Total Energy</b> |
|---------------|-----------------|---------------------|
| <b>REM</b>    | -7.589          | -31.368             |
| <b>Comp-1</b> | -6.195          | -7.928              |
| <b>EMC-1</b>  | -6.074          | -5.247              |
| <b>FAV</b>    | -5.901          | -4.163              |
| <b>TPP</b>    | -6.456          | -3.135              |

All energies are in kcal/mol. Colour fill indicates the best energies of docked complex.

EMC-1        =        Essramycin  
Comp-1       =        Monomethylated triazolopyrimidine  
TBP-2        =        MTP stereoisomer  
TPP-1        =        Triazolopyrimidine  
REM          =        Remdesivir  
FAV          =        Favipiravir

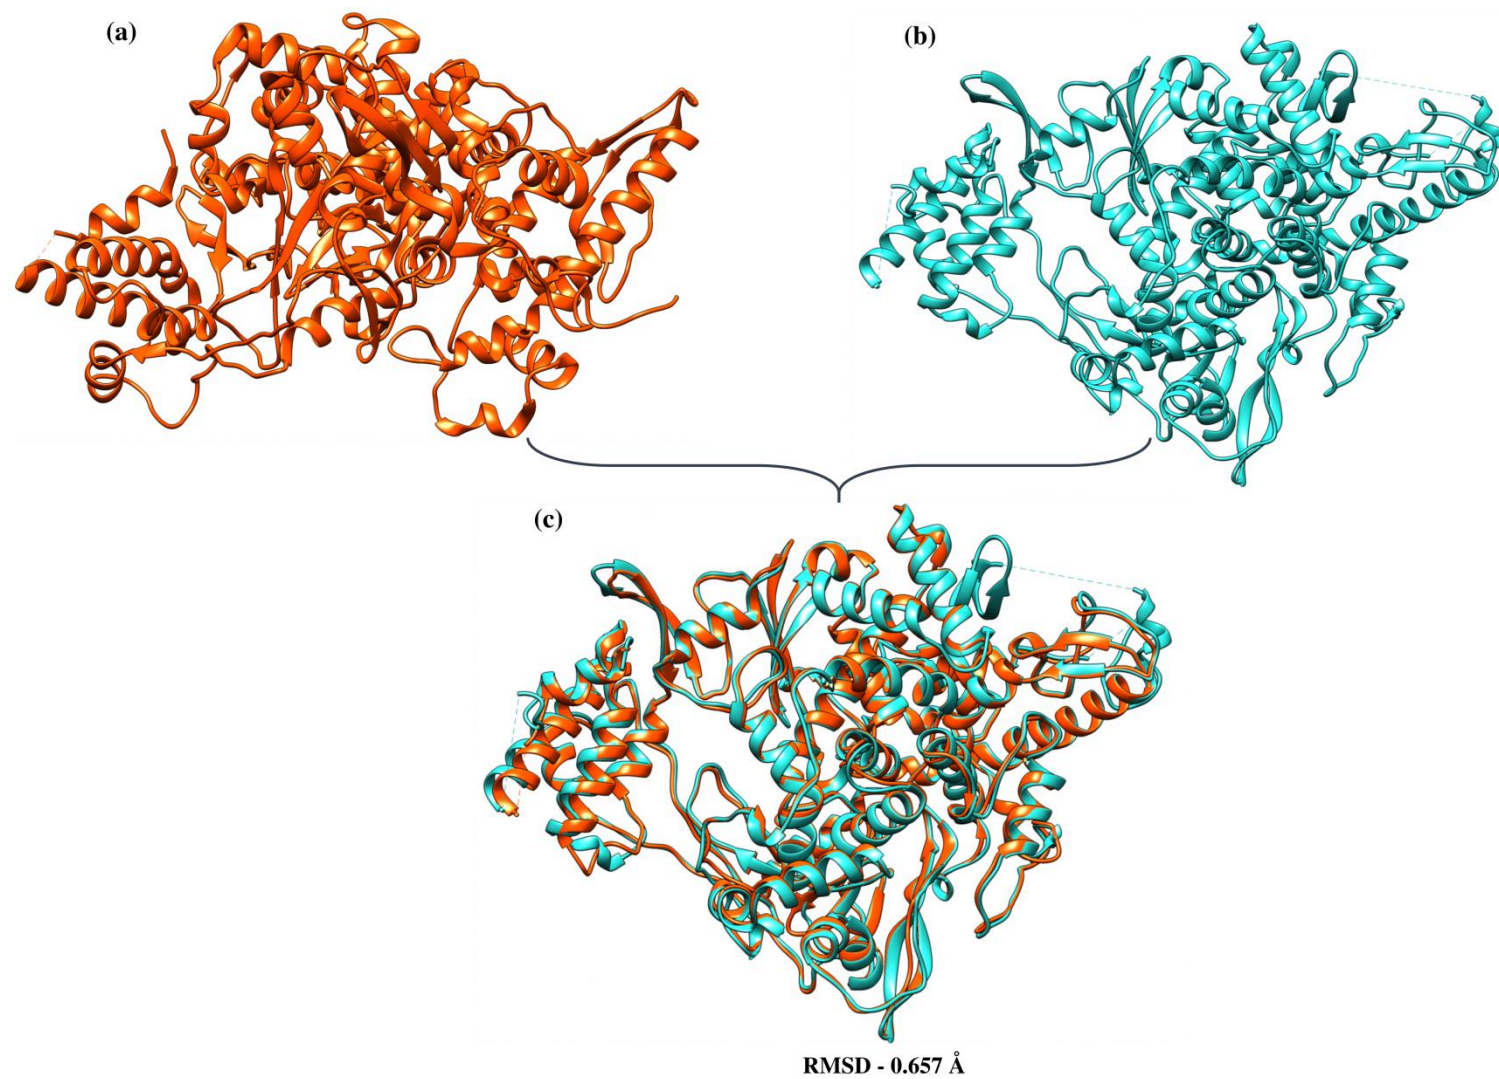

**Figure S1(A).** Superimposed structures of SARS-CoV-2 and SARS-CoV RdRp. (a) 3D structure of SARS-CoV, (b) 3D structure of SARS-CoV-2 and (c) superimposed conformation of SARS-CoV & SARS-CoV-2 RdRp.



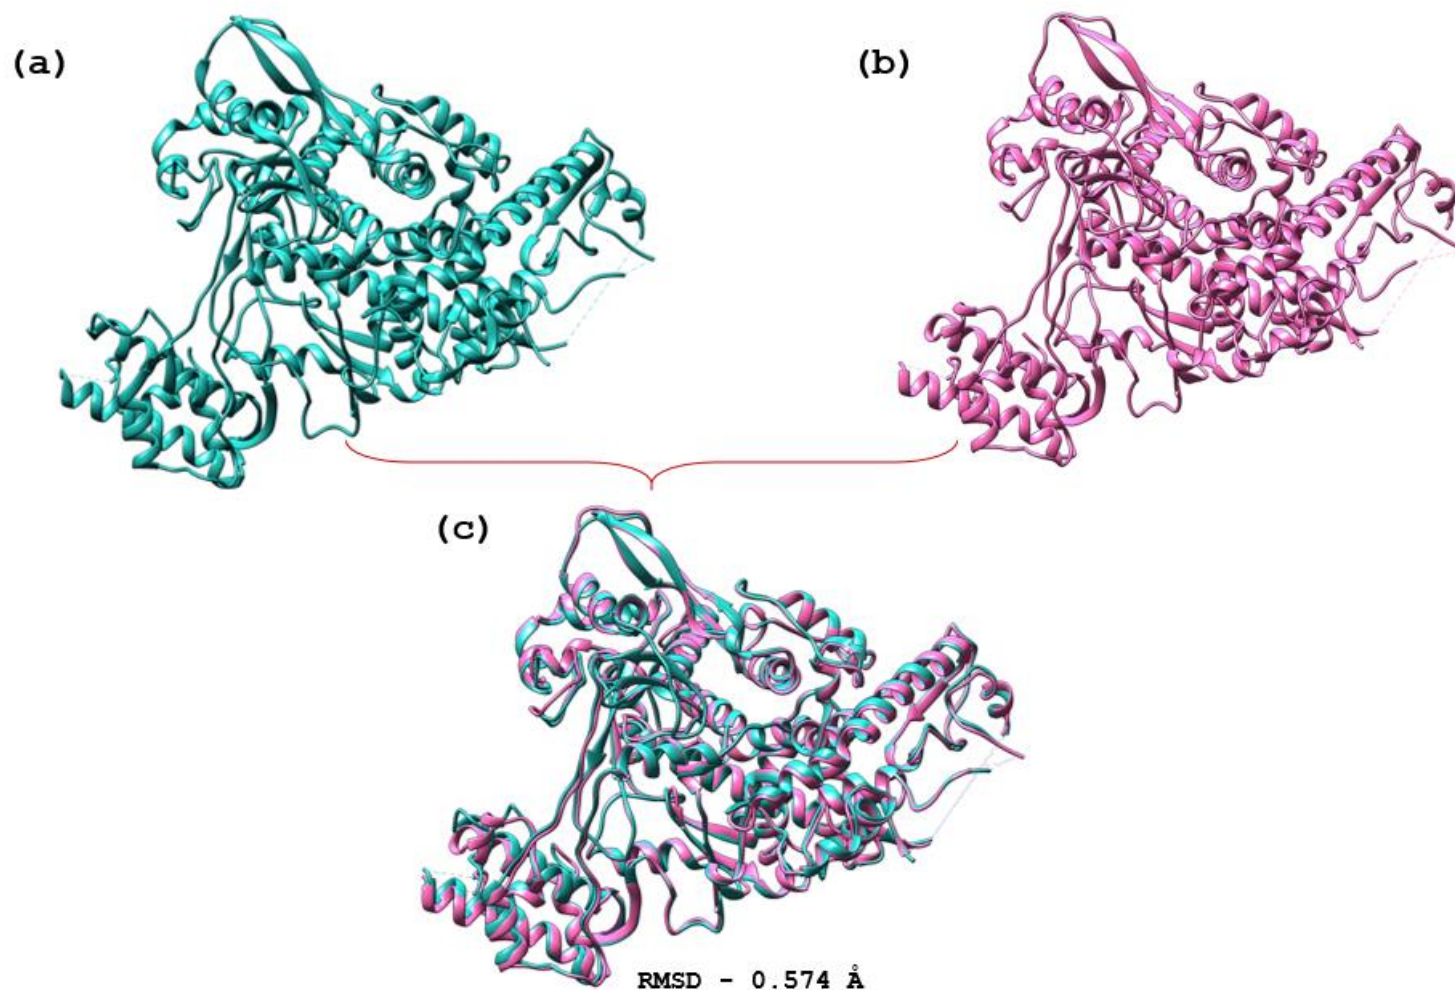

**Figure S1 (B).** Superimposed conformation of 7bv1 and 7bv2 RdRp protein of SARS-CoV-2. (a) Showing the apo RdRp (7bv1), (b) represent the complex RdRp (7bv2) and (c) superimposed structure of both protein

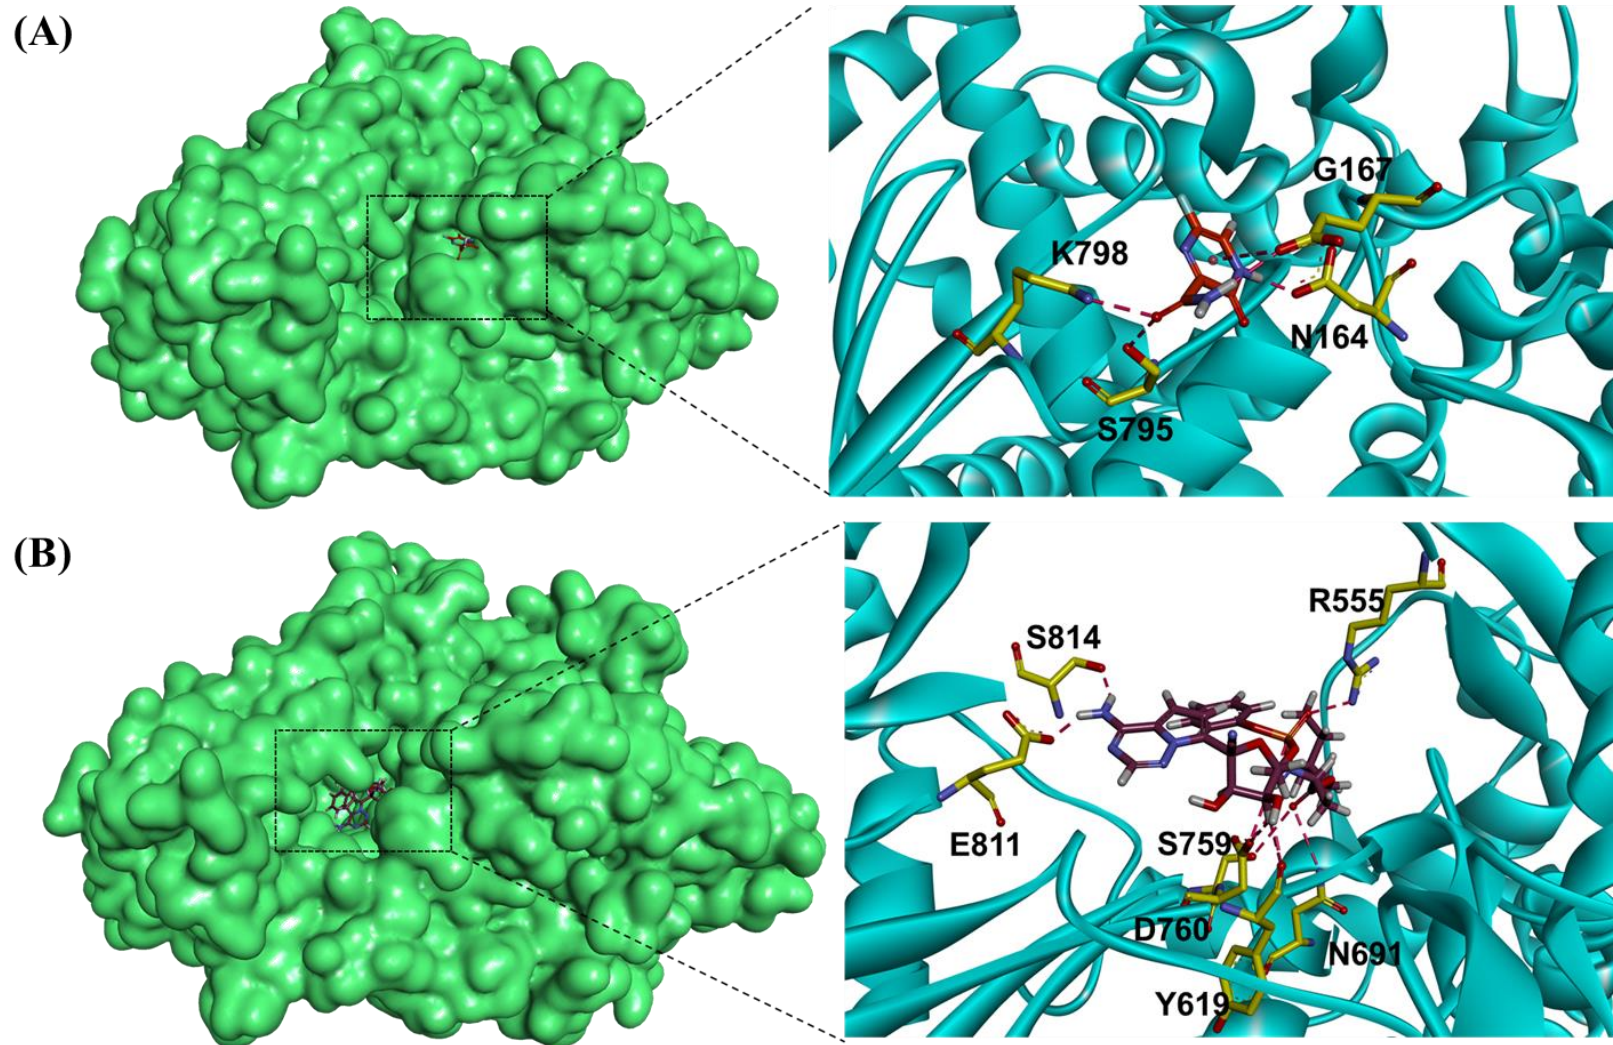

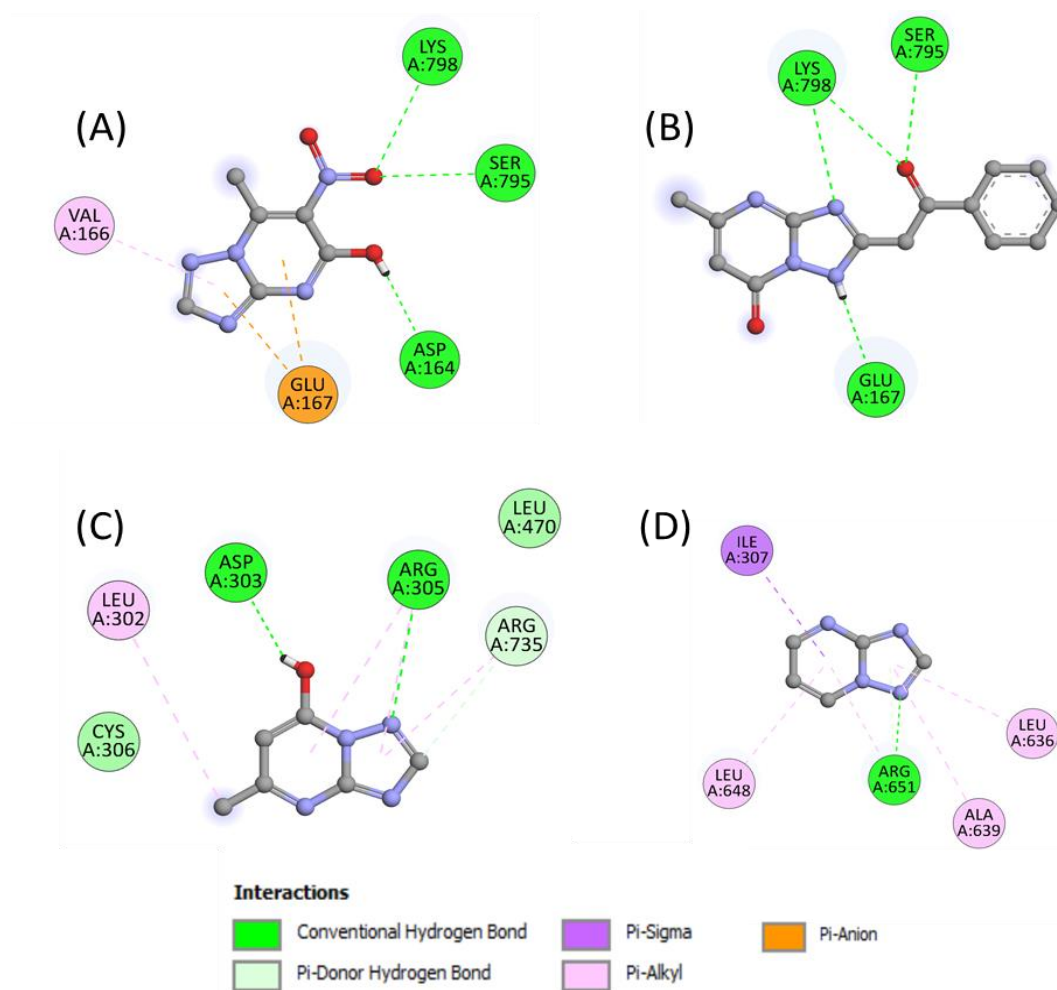

**Figure S3.** 2D representation of ligand interactions with SARS-CoV-2 RdRp. (A) Comp-1 (B) EMC-1 (C) TBP-2 (D) TPP-1.

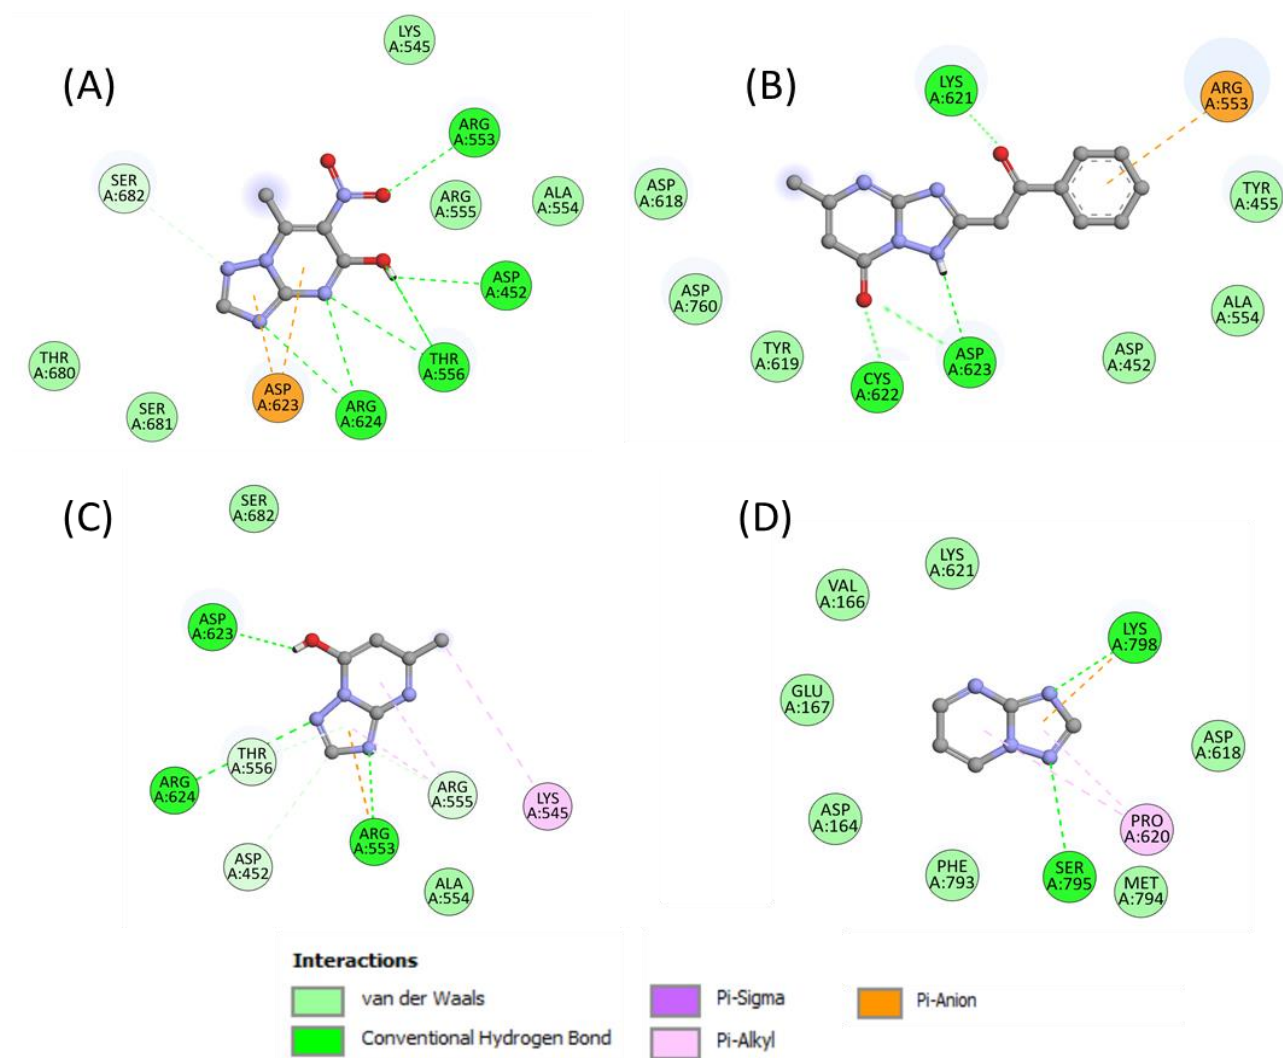

**Figure S4.** 2D representation of ligand interactions with SARS-CoV RdRp. (A) Comp-1 (B) EMC-1 (C) TBP-2 (D) TPP-1.



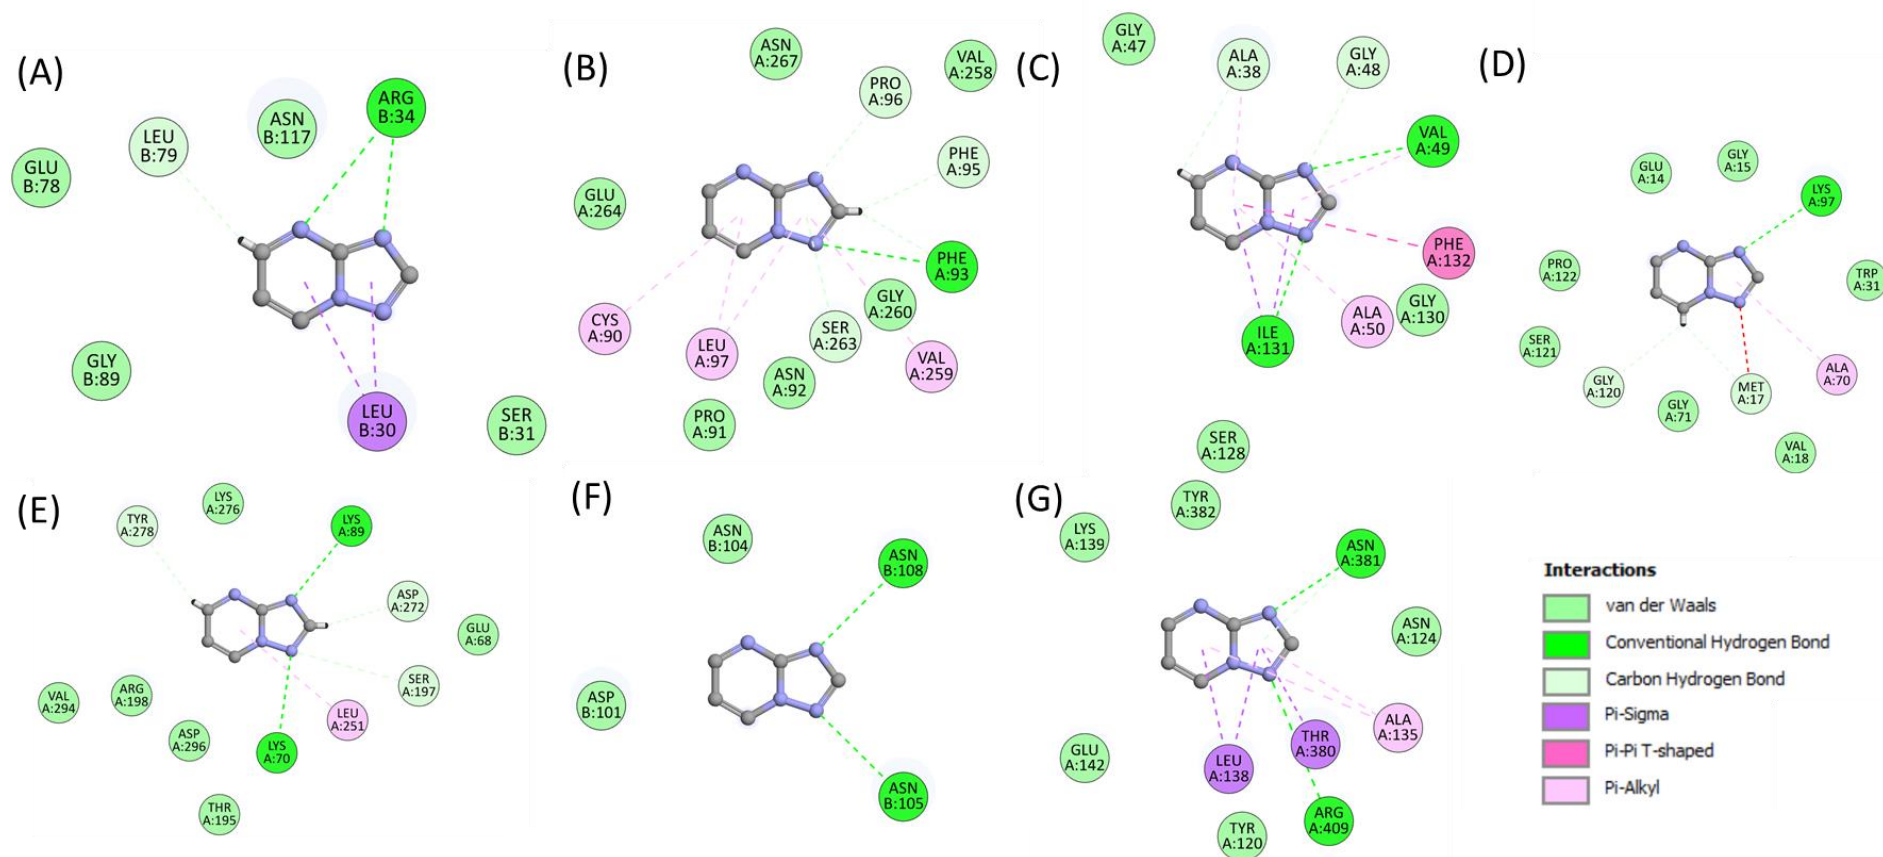

**Figure S5.** 2D representation of Comp-1 interactions with SARS-CoV-2 NSPs. (A) NSP1 (B) NSP2 (C) NSP3 (D) NSP5 (E) NSP8 (F) NSP13 (G) NSP15.

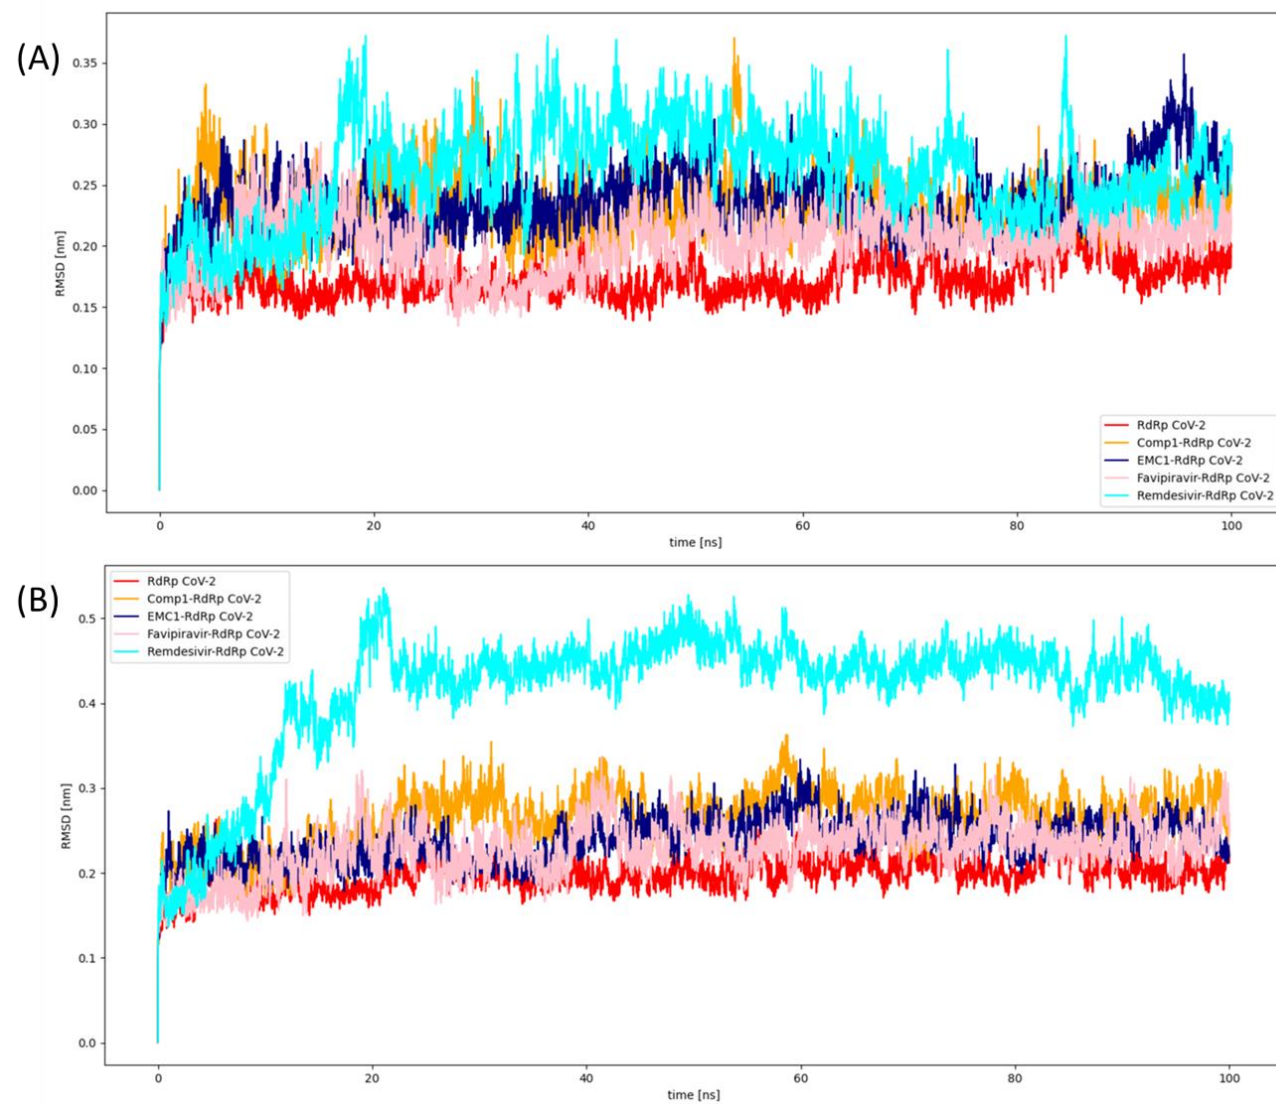

**Figure S6.** RMSD values of SARS-CoV-2 RdRp and complexes at (A) set random velocity of -1 (B) set random velocity of -2 during 100 ns MD simulation.

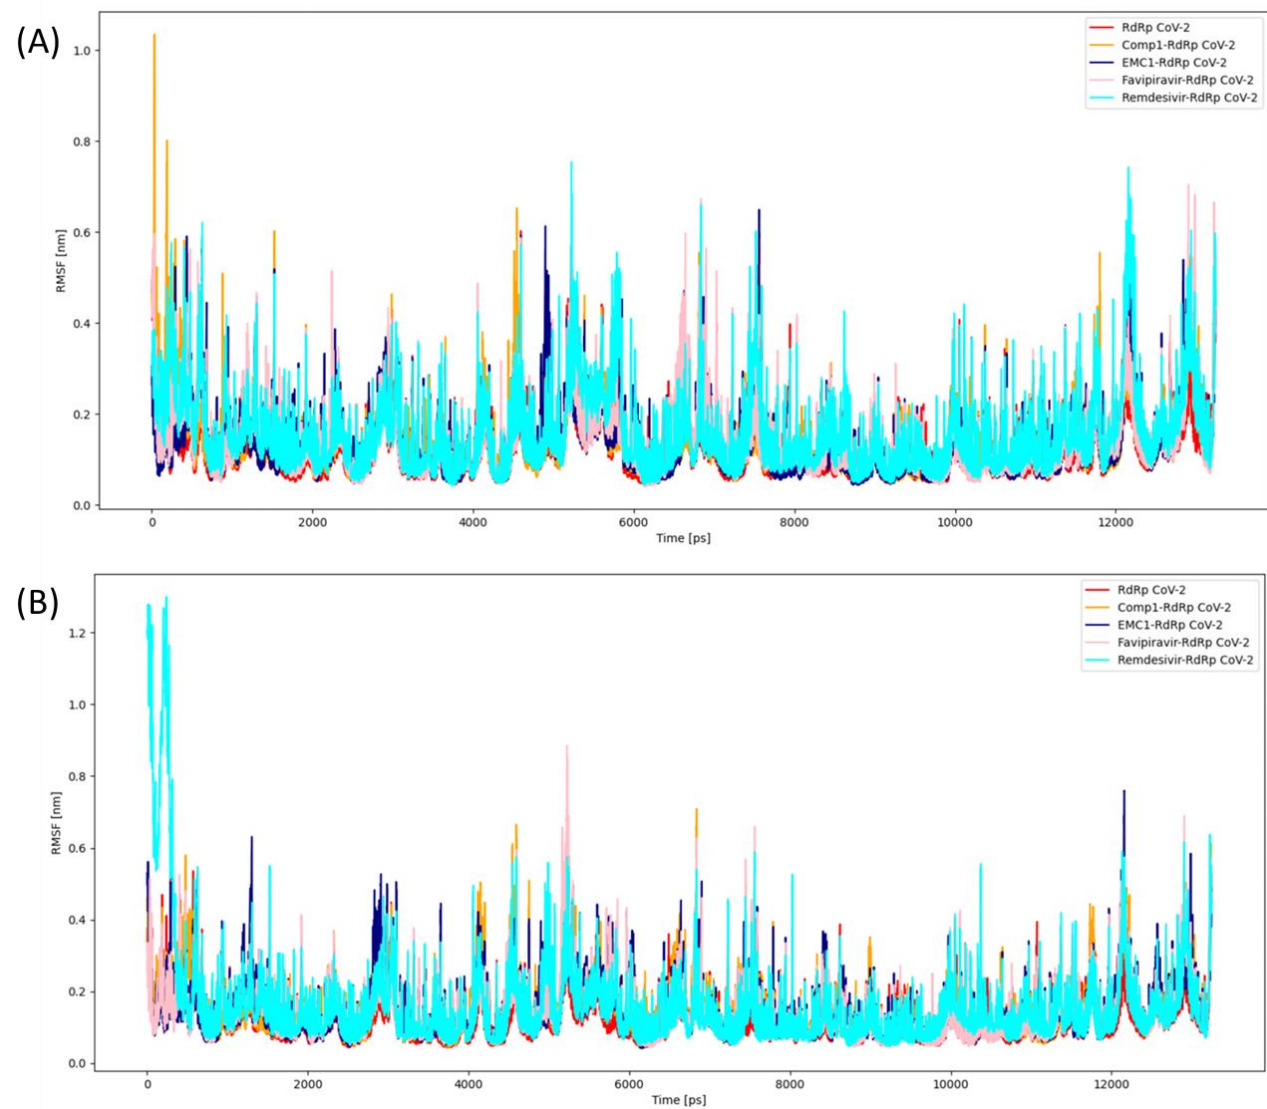

**Figure S7.** RMSF values of SARS-CoV-2 RdRp and complexes at (A) set random velocity of -1 (B) set random velocity of -2 during 100 ns MD simulation.

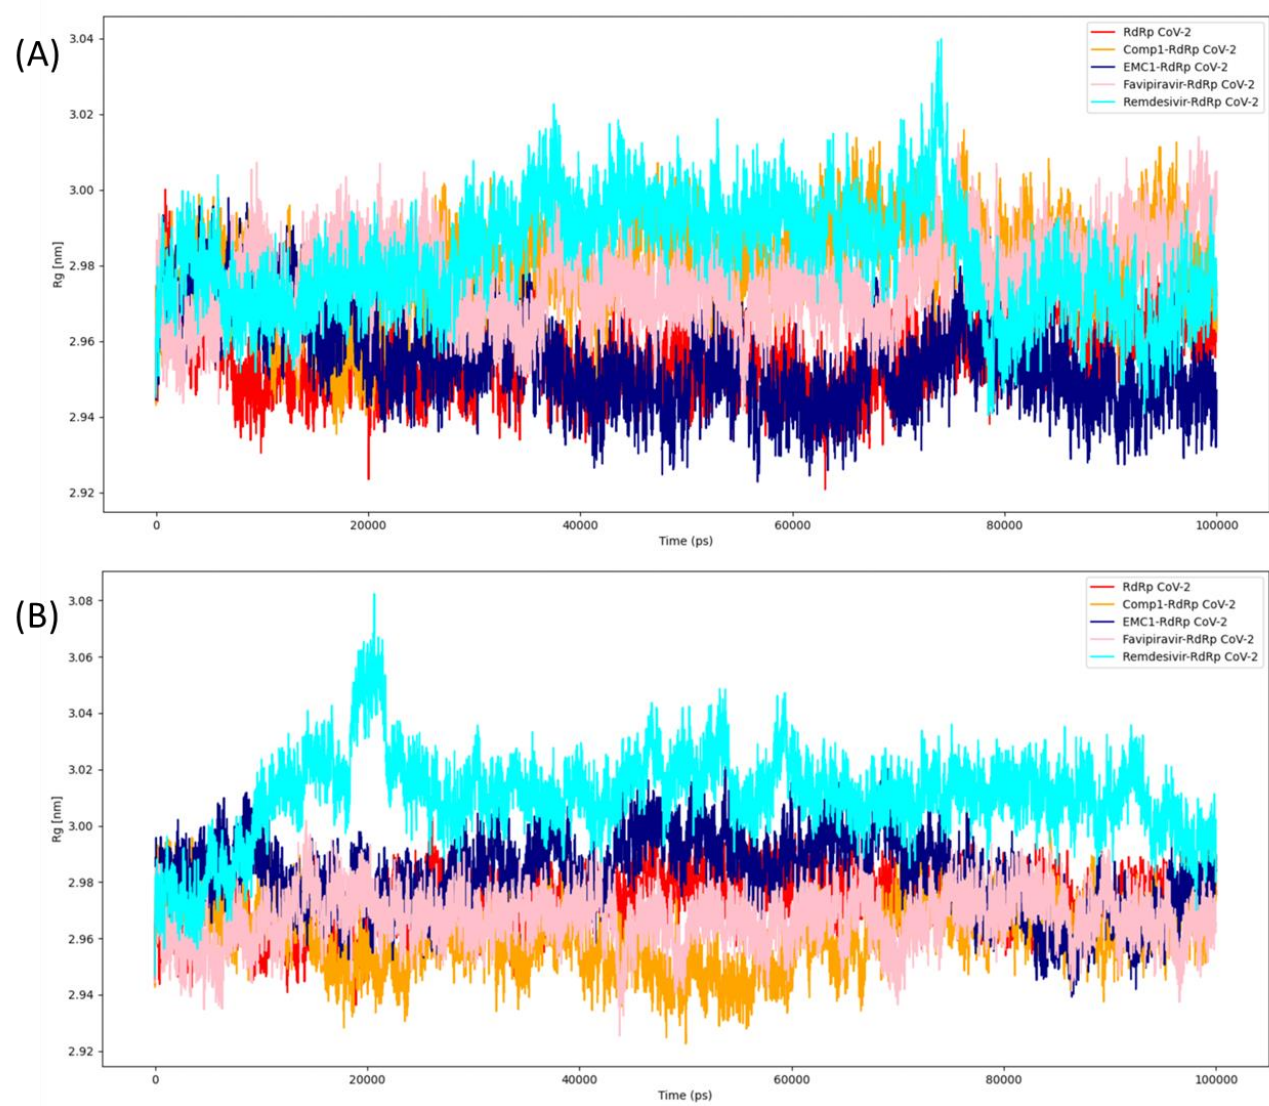

**Figure S8.**  $R_g$  values of SARS-CoV-2 RdRp and complexes at (A) set random velocity of -1 (B) set random velocity of -2 during 100 ns MD simulation.



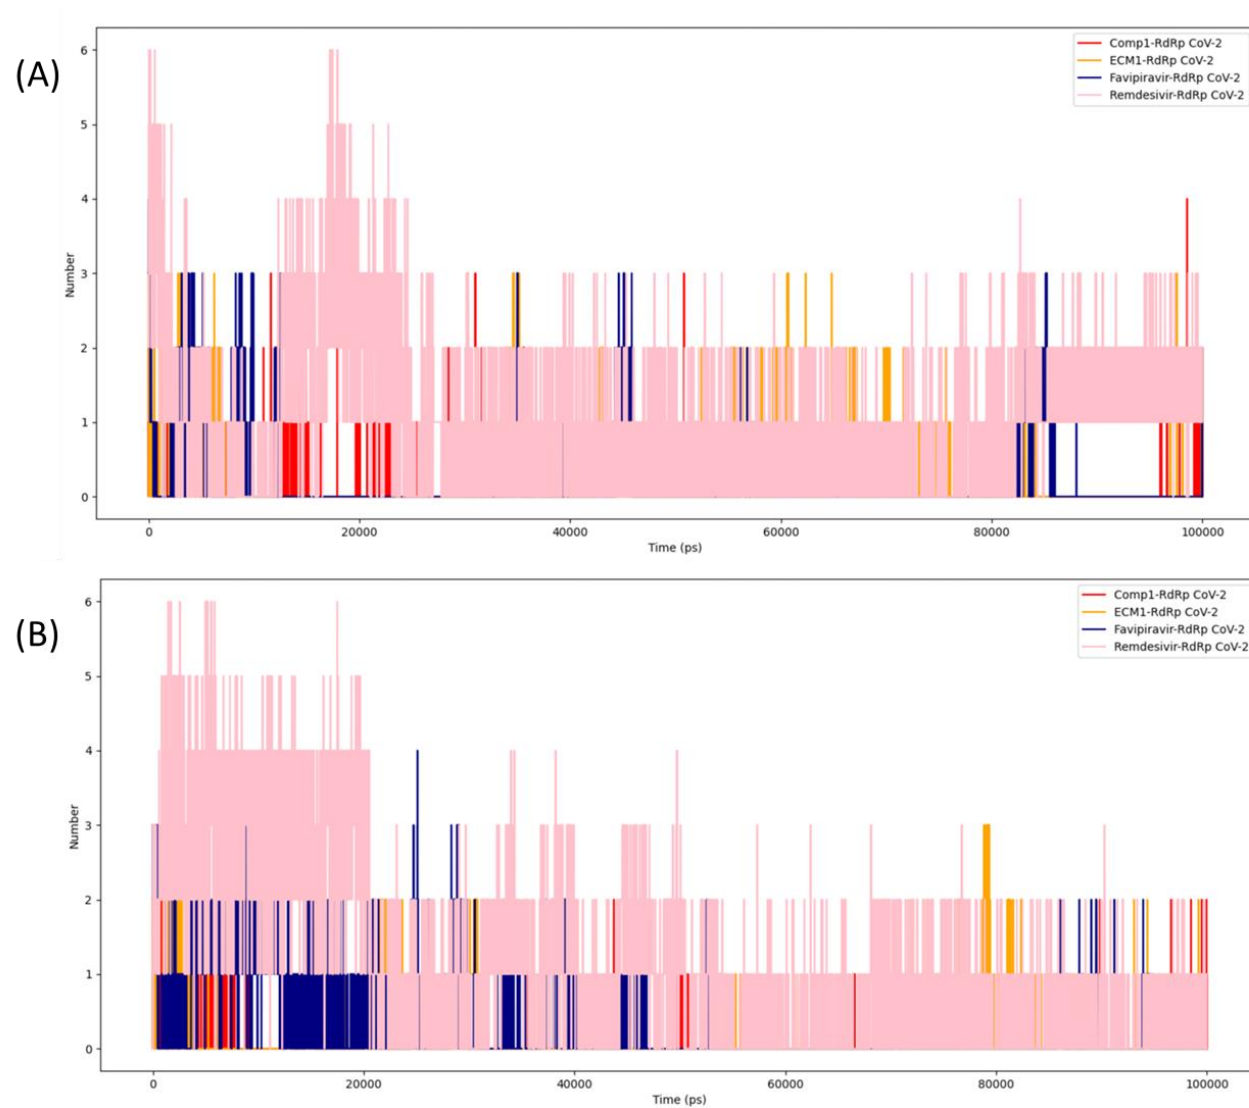

**Figure S9.** Number of H-bonds formed by SARS-CoV-2 RdRp-ligand complexes at (A) set random velocity of -1 (B) set random velocity of -2 during 100 ns MD simulation.

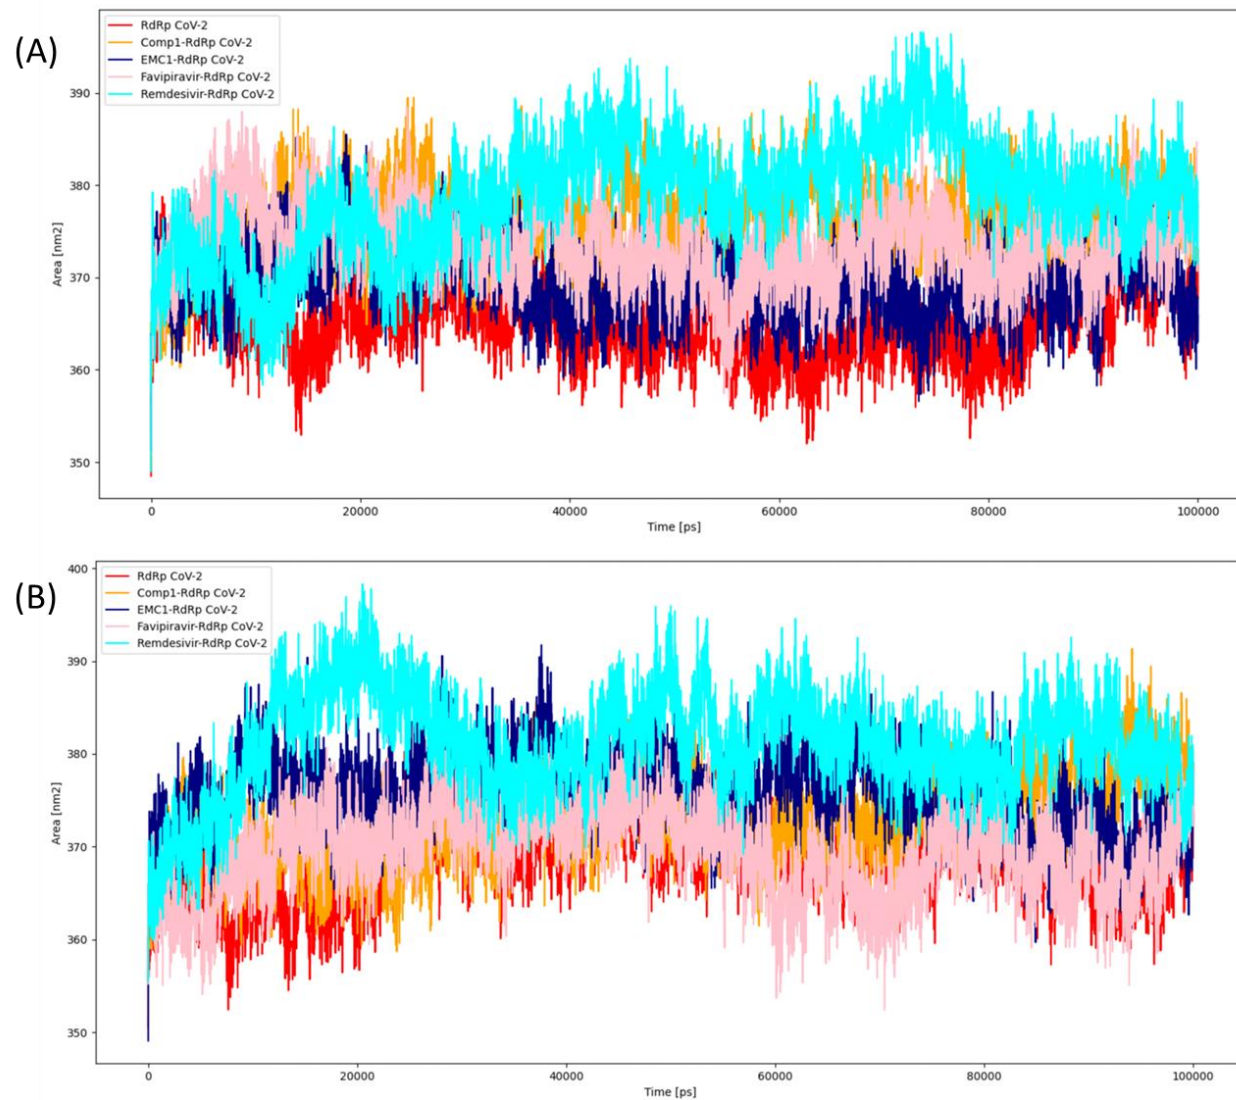

**Figure S10.** Solvent accessible surface area of SARS-CoV-2 RdRp and complexes at (A) set random velocity of -1 (B) set random velocity of -2 during 100 ns MD simulation.
